# Supplementary material for: Dynamic multivalent recognition of cyclodextrin vesicles
Source: Royal Society of Chemistry journal article supplement (doi:10.1039/b510540d), 2005-01-01
Supplement: b510540d.pdf [file b510540d.pdf]

# ELECTRONIC SUPPORTING INFORMATION

## Dynamic Multivalent Recognition of Cyclodextrin Vesicles

Choon Woo Lim, Bart Jan Ravoo\* and David N. Reinhoudt\*

*Laboratory of Supramolecular Chemistry and Technology, MESA+ Institute for Nanotechnology, University of Twente, P.O. Box 217, 7500 AE Enschede, The Netherlands. E-mail: b.j.ravoo@utwente.nl; d.n.reinhoudt@utwente.nl*

### S-1. Location of NBD-Chol 2 in CD vesicles.

$\text{Co}^{2+}$  is a powerful quencher for NBD fluorescence. However, if NBD is buried in a bilayer membrane, quenching by the hydrophilic  $\text{Co}^{2+}$  ion is not efficient. Chattopadhyay and London (*Biochim. Biophys. Acta*, **1998**, 938, 24-34; *Biochemistry*, **1987**, 26, 39-45) have proposed a correlation of the localization of NBD dyes in a bilayer membrane with the  $\text{Co}^{2+}$  quenching efficiency. Compared with their results, our experiments ( $K_{sv} = 8.09 \pm 0.85 \text{ M}^{-1}$ ) show that the localization of NBD-Chol 2 in the CD vesicles is similar to the localization of NBD in 6-NBD-phosphatidyl choline and 12-NBD-phosphatidyl choline, indicating that NBD-Chol 2 resides deeply in the CD vesicle membrane.

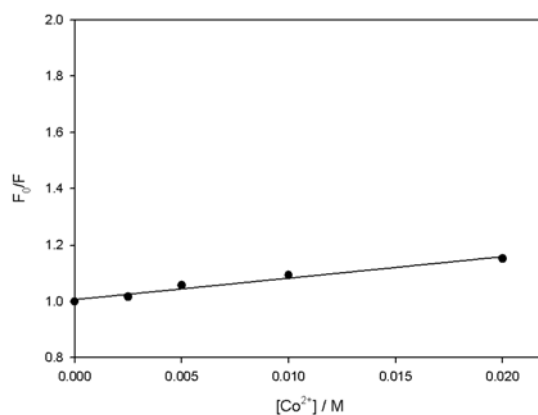

Quenching ( $F/F_0$ ) of NBD-Chol 2 in vesicles of  $\beta$ -CD 1b by the addition of  $\text{Co}^{2+}$  ion. Experiments were carried out in 10mM Tris buffer, 150mM NaCl, pH = 7.2.

## S-2. Addition of LRB-Ad2 **3** and LRB to vesicles of cyclodextrin **1b**

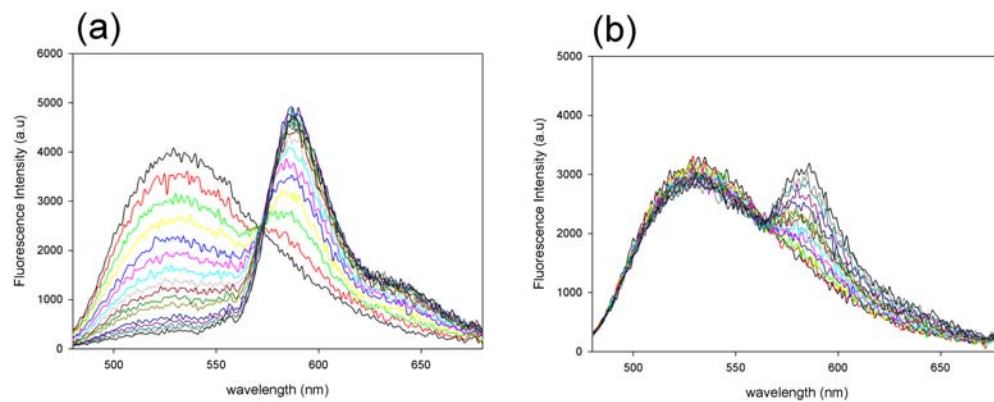

Fluorescence emission spectra ( $\lambda_{\text{ex}} = 450\text{nm}$ ) of vesicles of  $\beta$ -CD **1b** ( $10 \mu\text{M}$ ) containing 1 mol % NBD-Chol **2** ( $0.1 \mu\text{M}$ ) upon adding (a) divalent guest LRB-Ad<sub>2</sub> **3** (b) lissamine rhodamine B (LRB).  $[\text{LRB}] = 0 - 0.9 \mu\text{M}$  for both experiments. All measurements were carried out in 5 mM phosphate buffer at  $\text{pH} = 7.5$  and  $T = 25 \text{ }^\circ\text{C}$ .

### S-3. Calculation of $C_{\text{eff}}$ in CD vesicles

The effective concentration of cyclodextrin ( $C_{\text{eff}}$ ) experienced by guest **3** on the surface of a mixed vesicle of CDs **1a** and **1b** was calculated from the following geometric considerations, in analogy with ref 7:

molecular surface area of  $\alpha$ -CD **1a**:  $A_{\alpha\text{-CD}} = 3.4 \times 10^{-18} \text{ m}^2$  (ref 3)

molecular surface area of  $\beta$ -CD **1b**:  $A_{\beta\text{-CD}} = 3.75 \times 10^{-18} \text{ m}^2$  (ref 3)

fraction of  $\alpha$ -CD **1a** in mixed vesicles:  $f_{\alpha\text{-CD}}$

fraction of  $\beta$ -CD **1b** in mixed vesicles:  $f_{\beta\text{-CD}}$

fraction of surface area covered by  $\beta$ -CD **1b**:

$$\sigma_{\beta\text{-CD}} = (f_{\beta\text{-CD}} \times A_{\beta\text{-CD}}) / (f_{\beta\text{-CD}} \times A_{\beta\text{-CD}} + f_{\alpha\text{-CD}} \times A_{\alpha\text{-CD}})$$

surface coverage of host sites:

$$\Gamma_{s,\text{max}} (100\%) = 1 / (N_{Av} \times A_{\beta\text{-CD}} \times 10000) \text{ (mol cm}^{-2}\text{)}$$

$$\Gamma_s = \sigma_{\beta\text{-CD}} \times \Gamma_{s,\text{max}} (100\%)$$

distance between adamantyls in **3**:  $L = 3.49 \times 10^{-9} \text{ m}$  from CPK model

effective concentration of CD:

$$C_{\text{eff,max}} = \frac{\pi L^2 N_{Av} \Gamma_s - 1}{(2/3) \pi N_{Av} L^3} \quad (\text{ref 7})$$
